# Supplementary material for: Efficacy of Regorafenib and Trifluridine/Tipiracil According to Extended RAS Evaluation in Advanced Metastatic Colorectal Cancer Patients: A Multicenter Retrospective Analysis
Source: Springer Nature journal article supplement (doi:10.1007/s11523-024-01050-3), 2024-04-13

Original article

**Efficacy of Regorafenib and Trifluridine/Tipiracil according to extended *RAS* evaluation in advanced metastatic colorectal cancer patients: a multicenter retrospective analysis.**

Michele Basso<sup>1\*</sup>, Carlo Signorelli<sup>2\*</sup>, Maria Alessandra Calegari<sup>1</sup>, Jessica Lucchetti<sup>3</sup>, Ina Valeria Zurlo<sup>4</sup>, Emanuela Dell'Aquila<sup>5</sup>, Giulia Arrivi<sup>6</sup>, Federica Zoratto<sup>7</sup>, Fiorenza Santamaria<sup>8,9</sup>, Rosa Saltarelli<sup>10</sup>, Giovanni Trovato<sup>1</sup>, Giulia Caira<sup>1</sup>, Lorenzo Angotti<sup>3</sup>, Marta Schirripa<sup>2</sup>, Annunziato Anghelone<sup>1</sup>, Francesco Schietroma<sup>1</sup>, Mario Giovanni Chilelli<sup>2</sup>, Lisa Salvatore<sup>1</sup>, Carmelo Pozzo<sup>1</sup>, Giampaolo Tortora<sup>1</sup>.

\*these authors equally contributed

1. Fondazione Policlinico Universitario "A Gemelli"-IRCCS, Comprehensive Cancer Center, Rome, Italy
2. Medical Oncology Unit, Belcolle Hospital, ASL Viterbo, Viterbo, Italy
3. Operative Research Unit of Medical Oncology, Fondazione Policlinico Universitario Campus Bio-Medico, Rome, Italy
4. Medical Oncology, "Vito Fazzi" Hospital, Lecce, Italy;
5. Medical Oncology 1, IRCCS Regina Elena National Cancer Institute, Rome, Italy
6. Department of Clinical and Molecular Medicine, Sapienza University of Rome, Oncology Unit, Sant' Andrea University Hospital, Rome, Italy.
7. Medical Oncology Unit, ASL Latina, Latina, Italy
8. Department of Experimental Medicine, Sapienza University of Rome, Italy.
9. Medical Oncology A, Department of Hematology, Oncology and Dermatology, Policlinico Umberto I, Sapienza University of Rome, Italy.
10. UOC Oncology, San Giovanni Evangelista Hospital, ASL RM5, Tivoli (RM), Italy

Short title: Efficacy of Regorafenib and Trifluridine/Tipiracil according to *RAS* analysis

**Corresponding author:**

Dr Michele Basso

Fondazione Policlinico Universitario "A Gemelli"-IRCCS

Largo Agostino Gemelli n 8

00168 Rome, Italy

Mail: [michele.basso@policlinicogemelli.it](mailto:michele.basso@policlinicogemelli.it)

**Table 1S. Flow-chart of the study**

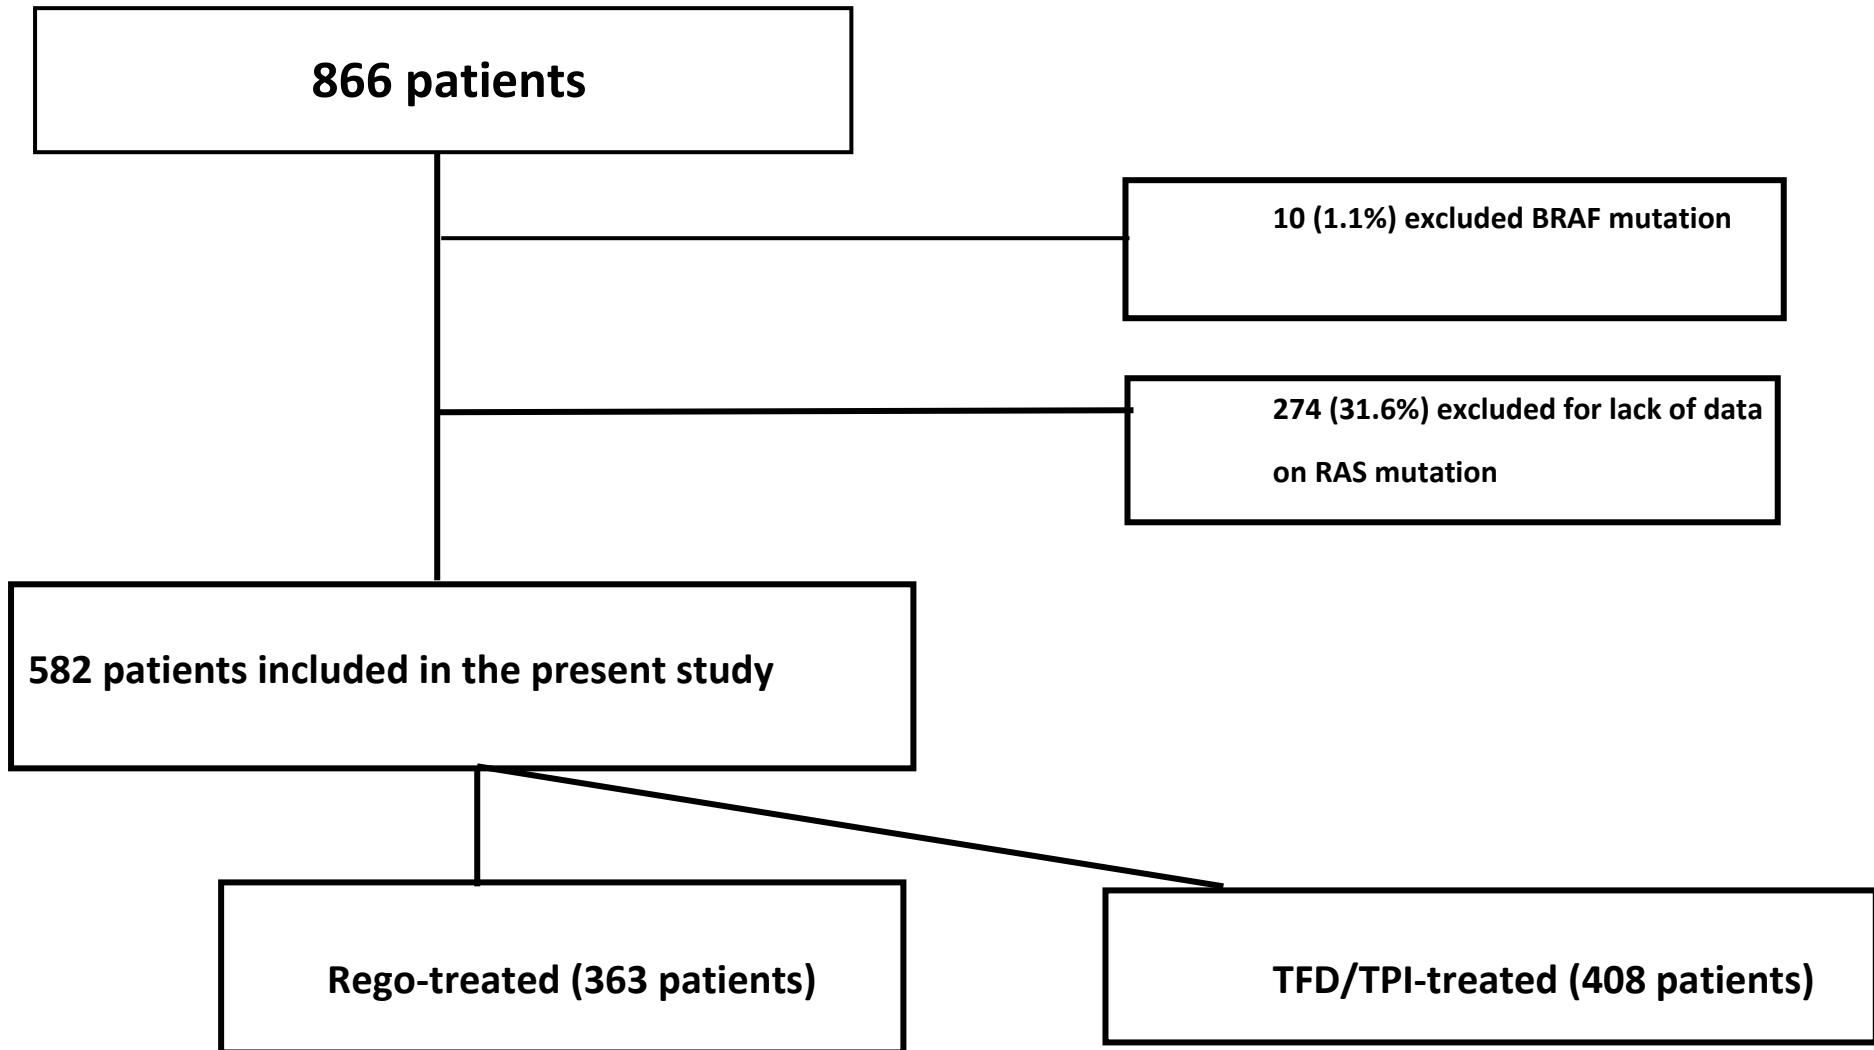

**Table 2S. Comparison of patients' characteristics of rego-treated patients (n=363) and TFD/TPI-treated (408) according to each subgroup.**

|                         | <i>wt</i> (n, %) | Codon 12 (n, %) | Codon 13 (n, %) | Rare (n, %)   | G12C (n, %)   | G12D (n, %)   |
|-------------------------|------------------|-----------------|-----------------|---------------|---------------|---------------|
| <b>Median age (yrs)</b> |                  |                 |                 |               |               |               |
| Rego                    | 64.6             | 66.4            | 67.2            | 66.9          | 62.8          | 65.1          |
| TFD/TPI                 | 66.8             | 68.0            | 68.6            | 69.0          | 66.0          | 68.3          |
| <i>p</i>                | <i>p 0.9</i>     | <i>p 0.9</i>    | <i>p 1.0</i>    | <i>p 0.8</i>  | <i>p 0.79</i> | <i>p 0.86</i> |
| <b>Gender (M/F)</b>     |                  |                 |                 |               |               |               |
| Rego                    | 100/74           | 57/32           | 14/15           | 18/12         | 7/3           | 19/12         |
| TFD/TPI                 | 97/80            | 55/35           | 16/22           | 17/20         | 11/3          | 27/25         |
| <i>p</i>                | <i>p 0.69</i>    | <i>p 0.8</i>    | <i>p 0.7</i>    | <i>p 0.36</i> | <i>p 0.86</i> | <i>p 0.54</i> |
| <b>PS ECOG:</b>         |                  |                 |                 |               |               |               |
| Rego                    |                  |                 |                 |               |               |               |
| <b>0</b>                | 50 (28.7)        | 23 (25.8)       | 4 (13.7)        | 8 (26.6)      | 4 (40.0)      | 10 (32.2)     |
| <b>1</b>                | 98 (56.3)        | 58 (65.1)       | 24 (82.7)       | 16 (53.3)     | 5 (50.0)      | 19 (61.2)     |
| <b>2</b>                | 26 (14.9)        | 8 (8.9)         | 1 (3.4)         | 6 (20.1)      | 1 (10.0)      | 2(6.4)        |
| TFD/TPI                 |                  |                 |                 |               |               |               |
| <b>0</b>                | 48 (27.1)        | 26 (28.8)       | 7 (18.4)        | 12 (32.4)     | 4 (28.5)      | 9 (17.3)      |

|          |               |              |              |               |               |               |
|----------|---------------|--------------|--------------|---------------|---------------|---------------|
| 1        | 102 (57.6)    | 56 (62.2)    | 29 (76.3)    | 18 (48.6)     | 9 (64.2)      | 34 (65.3)     |
| 2        | 27 (15.2)     | 8 (8.8)      | 2 (5.2)      | 7 (18.9)      | 1 (7.1)       | 9 (17.3)      |
| <i>p</i> | <i>p 0.94</i> | <i>p 0.8</i> | <i>p 0.8</i> | <i>p 0.87</i> | <i>p 0.78</i> | <i>p 0.15</i> |

**Primary tumor location**

Rego

|        |           |           |           |           |          |           |
|--------|-----------|-----------|-----------|-----------|----------|-----------|
| Right  | 47 (27.0) | 33 (37.0) | 10 (34.4) | 9 (30.0)  | 2 (20.0) | 11 (35.5) |
| Left   | 99 (57.0) | 43 (48.4) | 16 (55.2) | 18 (60.0) | 5 (50.0) | 13 (41.9) |
| Rectum | 28 (16.0) | 13 (14.6) | 3 (10.4)  | 3 (10.0)  | 3 (30.0) | 7 (22.6)  |

TFD/TPI

|          |               |               |               |               |               |               |
|----------|---------------|---------------|---------------|---------------|---------------|---------------|
| Right    | 47 (26.5)     | 26 (28.8)     | 14 (36.8)     | 15 (40.5)     | 4 (28.5)      | 13 (25.0)     |
| Left     | 90 (50.8)     | 41 (45.5)     | 16 (42.1)     | 14 (37.8)     | 8 (57.1)      | 27 (51.9)     |
| Rectum   | 40 (22.5)     | 23 (25.5)     | 8 (21.0)      | 8 (21.6)      | 2 (14.2)      | 12 (23.1)     |
| <i>p</i> | <i>p 0.28</i> | <i>p 0.16</i> | <i>p 0.40</i> | <i>p 0.16</i> | <i>p 0.63</i> | <i>p 0.56</i> |

**Metastatic synchronous disease:**

|          |                      |               |               |               |               |               |
|----------|----------------------|---------------|---------------|---------------|---------------|---------------|
| Rego     | 145 (83.3)           | 70 (78.6)     | 20 (68.9)     | 25 (83.3)     | 6 (60.0)      | 25 (80.6)     |
| TFD/TPI  | 130 (73.4)           | 64 (71.1)     | 23 (60.5)     | 29 (78.3)     | 10 (71.4)     | 39 (75.0)     |
| <i>p</i> | <b><i>p 0.03</i></b> | <i>p 0.32</i> | <i>p 0.64</i> | <i>p 0.84</i> | <i>p 0.88</i> | <i>p 0.86</i> |

**Site of metastatic disease**

Rego

|                      |           |           |           |           |          |           |
|----------------------|-----------|-----------|-----------|-----------|----------|-----------|
| <b>Liver only</b>    | 19 (10.9) | 6 (6.7)   | 5 (17.2)  | -         | 2 (20.0) | 4 (12.9)  |
| <b>Liver + other</b> | 86 (49.5) | 46 (51.6) | 18 (62.2) | 19 (63.3) | 7 (70.0) | 17 (54.8) |
| <b>Other sites</b>   | 69 (39.7) | 37 (41.5) | 6 (20.6)  | 11(36.7)  | 1 (10.0) | 10 (32.3) |

TFD/TPI

|                      |           |           |           |           |          |           |
|----------------------|-----------|-----------|-----------|-----------|----------|-----------|
| <b>Liver only</b>    | 22 (12.4) | 11 (12.2) | 6 (15.7)  | 3 (8.1)   | 3 (21.4) | 6 (11.5)  |
| <b>Liver + other</b> | 89 (50.2) | 46 (51.1) | 19 (51.3) | 23 (62.1) | 8 (57.1) | 34 (65.3) |
| <b>Other sites</b>   | 66 (37.2) | 33 (36.6) | 13(34.2)  | 11 (29.7) | 3 (21.4) | 12 (23.0) |

*p* *p 0.80* *p 0.42* *p 0.46* *p 0.26* *p 0.73* *p 0.36*

**Previous lines of therapy**

Rego

|              |           |           |           |           |          |           |
|--------------|-----------|-----------|-----------|-----------|----------|-----------|
| <b>2</b>     | 69 (39.6) | 56 (62.9) | 16 (55.1) | 20 (66.6) | 7 (70.0) | 18 (58.0) |
| <b>3</b>     | 63 (36.2) | 14 (15.7) | 6 (20.6)  | 3 (10.0)  | 2 (20.0) | 10 (32.2) |
| <b>4</b>     | 19 (10.9) | 4 (4.4)   | 2 (6.8)   | 2 (6.6)   | 1 (10.0) | 3 (9.6)   |
| <b>&gt;4</b> | 23 (13.2) | 15 (16.8) | 5 (17.2)  | 5 (16.6)  | --       | --        |

TFD/TPI

|          |           |           |           |           |          |           |
|----------|-----------|-----------|-----------|-----------|----------|-----------|
| <b>2</b> | 77 (43.5) | 61 (67.7) | 16 (42.1) | 19 (51.3) | 9 (64.2) | 26 (50.0) |
| <b>3</b> | 71 (40.1) | 18 (20.0) | 12 (31.5) | 8 (21.6)  | 4 (28.5) | 17 (32.6) |
| <b>4</b> | 9 (5.0)   | 2 (2.2)   | 2 (5.2)   | 3 (8.1)   | 1 (7.1)  | 9 (17.3)  |

|              |               |               |               |               |               |               |
|--------------|---------------|---------------|---------------|---------------|---------------|---------------|
| <b>&gt;4</b> | 20 (11.2)     | 9 (10.0)      | 8 (21.0)      | 7 (18.9)      | --            | --            |
| <i>P</i>     | <i>p 0.29</i> | <i>p 0.41</i> | <i>p 0.67</i> | <i>p 0.54</i> | <i>p 0.87</i> | <i>p 0.60</i> |

**Previous drugs administered:**

Rego

|                         |            |           |           |           |          |           |
|-------------------------|------------|-----------|-----------|-----------|----------|-----------|
| <b>Fluoropyrimidine</b> | 131 (74.0) | 65 (73.0) | 21 (72.4) | 23 (76.6) | 7 (70.0) | 25 (80.6) |
| <b>Oxaliplatin</b>      | 127 (71.7) | 58 (65.1) | 22 (75.8) | 22 (73.3) | 7 (70.0) | 23 (74.1) |
| <b>Irinotecan</b>       | 119 (67.2) | 52 (58.4) | 23 (79.3) | 20 (66.6) | 6 (60.0) | 22 (70.9) |
| <b>Bevacizumab</b>      | 125 (70.6) | 59 (66.2) | 19 (65.5) | 17 (56.6) | 7 (70.0) | 23 (74.1) |

|                      |            |           |          |          |          |          |
|----------------------|------------|-----------|----------|----------|----------|----------|
| <b>Anti-EGFRs</b>    | 129 (72.8) | --        | --       | --       | --       | --       |
| <b>Immunotherapy</b> | 4 (2.2)    | 1 (1.1)   | 1 (3.4)  | --       | --       | --       |
| <b>Aflibercept</b>   | 12 (6.7)   | 7 (7.8)   | 2 (6.8)  | 6 (20.0) | 2 (20.0) | 4 (12.9) |
| <b>Unknown</b>       | 43 (24.7)  | 22 (24.7) | 8 (27.5) | 7 (23.3) | 2 (20.0) | 6 (19.3) |

TFD/TPI

|                         |            |           |           |           |            |            |
|-------------------------|------------|-----------|-----------|-----------|------------|------------|
| <b>Fluoropyrimidine</b> | 173 (97.7) | 86 (95.5) | 36 (94.7) | 36 (97.2) | 14 (100.0) | 52 (100.0) |
| <b>Oxaliplatin</b>      | 165 (93.2) | 81 (90.0) | 32 (84.2) | 34 (91.8) | 13 (92.8)  | 43 (82.6)  |
| <b>Irinotecan</b>       | 166 (93.7) | 82 (91.1) | 35 (92.1) | 34 (91.8) | 14 (100.0) | 45 (86.5)  |
| <b>Bevacizumab</b>      | 95 (53.6)  | 75 (83.3) | 28 (73.6) | 28 (75.6) | 9 (64.2)   | 42 (80.7)  |
| <b>Anti-EGFRs</b>       | 154 (87.0) | --        | --        | --        | --         | --         |
| <b>Immunotherapy</b>    | 2 (1.1)    | 2 (2.2)   | 2 (5.2)   | --        | --         | --         |
| <b>Aflibercept</b>      | 9 (5.0)    | 12 (13.3) | 6 (15.7)  | 12 (32.4) | 4 (28.5)   | 8 (15.3)   |

|                |                       |                       |               |               |               |                      |
|----------------|-----------------------|-----------------------|---------------|---------------|---------------|----------------------|
| <b>Unknown</b> | 4 (2.2)               | 3 (3.3)               | 2 (5.2)       | 1 (2.7)       | --            | --                   |
| <i>p</i>       | <b><i>p 0.001</i></b> | <b><i>p 0.001</i></b> | <i>p 0.26</i> | <i>p 0.12</i> | <i>p 0.50</i> | <b><i>p 0.04</i></b> |

**Receiving both drugs**

**Rego**

|                   |           |           |           |           |          |           |
|-------------------|-----------|-----------|-----------|-----------|----------|-----------|
| Receiving TFD/TPI | 79 (45.4) | 47 (52.8) | 17 (58.6) | 16 (53.3) | 6 (60.0) | 19 (61.2) |
| Before rego       | 46 (26.4) | 26 (29.2) | 8 (27.5)  | 10 (33.3) | 4 (40.0) | 9 (29.0)  |
| After rego        | 33 (18.9) | 21 (23.5) | 9 (31.0)  | 6 (20.0)  | 2 (20.0) | 10 (32.2) |

*TFD/TPI*

|                |           |           |           |           |          |           |
|----------------|-----------|-----------|-----------|-----------|----------|-----------|
| Receiving Rego | 80 (45.1) | 49 (54.4) | 17 (44.7) | 16 (43.2) | 7 (50.0) | 19 (36.5) |
| Before TFD/TPI | 32 (18.0) | 19 (21.1) | 9 (23.6)  | 5 (13.5)  | 2 (14.2) | 10 (19.2) |
| After TFD/TPI  | 48 (27.1) | 30 (33.3) | 8 (21.0)  | 11 (29.7) | 5 (35.7) | 9 (17.3)  |

|          |               |               |               |               |               |               |
|----------|---------------|---------------|---------------|---------------|---------------|---------------|
| <i>P</i> | <i>p 0.90</i> | <i>p 0.90</i> | <i>p 0.50</i> | <i>p 0.56</i> | <i>p 0.94</i> | <i>p 0.06</i> |
|----------|---------------|---------------|---------------|---------------|---------------|---------------|

Abbreviations: ecog, eastern cooperative oncology group; EGFR, epidermal growth factor receptor; f, female; m, male; n, number; ps, performance status; rego, regorafenib; TFD/TPI, trifluridine/tipiracil; yrs, years; wt, wild type



**Table 3S. Objective response according to RAS subgroups**

|                           | <i>Partial response (n)</i> | <i>Stable disease (n)</i> | <i>Progressive disease (n)</i> | <i>p</i> |
|---------------------------|-----------------------------|---------------------------|--------------------------------|----------|
| <b>WT patients</b>        |                             |                           |                                |          |
| Rego-treated (174 pts)    | 8                           | 26                        | 140                            | 0.74     |
| TFD/TPI-treated (177 pts) | 7                           | 22                        | 148                            |          |
| <b>Codon 12</b>           |                             |                           |                                |          |
| Rego-treated (89 pts)     | 2                           | 14                        | 73                             | 0.76     |
| TFD/TPI-treated (90 pts)  | 2                           | 18                        | 70                             |          |
| <b>Codon 13</b>           |                             |                           |                                |          |
| Rego-treated (29 pts)     | 0                           | 5                         | 24                             | 0.35     |
| TFD/TPI-treated (38 pts)  | 2                           | 4                         | 32                             |          |
| <b>Rare mutations</b>     |                             |                           |                                |          |
| Rego-treated (30 pts)     | 0                           | 6                         | 24                             | 0.53     |
| TFD/TPI-treated (37 pts)  | 1                           | 5                         | 31                             |          |
| <b>G12C mutation</b>      |                             |                           |                                |          |

|                          |   |   |    |     |
|--------------------------|---|---|----|-----|
| Rego-treated (10 pts)    | 0 | 3 | 7  | 1.0 |
| TFD/TPI-treated (14 pts) | 0 | 3 | 11 |     |

**G12D mutation**

|                          |   |   |    |      |
|--------------------------|---|---|----|------|
| Rego-treated (31 pts)    | 0 | 4 | 27 | 0.61 |
| TFD/TPI-treated (52 pts) | 1 | 9 | 41 |      |

**Table 4S. Dose reductions according to each subgroup**

|                        | <b>WT</b>      | <b>Codon 12</b> | <b>Codon 13</b> | <b>Rare</b>   | <b>G12C</b>  | <b>G12D</b>   |
|------------------------|----------------|-----------------|-----------------|---------------|--------------|---------------|
| <b>Rego-treated</b>    | 174 pts        | 89 pts          | 29 pts          | 30 pts        | 10 pts       | 31 pts        |
| 100% dose              | 110            | 56              | 16              | 12            | 5            | 20            |
| 75% dose               | 35             | 18              | 8               | 9             | 3            | 6             |
| 50% dose               | 29             | 15              | 5               | 9             | 2            | 5             |
| <b>TFD/TPI-treated</b> | 177 pts        | 90 pts          | 38 pts          | 37 pts        | 14 pts       | 52 pts        |
| 100% dose              | 133            | 69              | 28              | 26            | 8            | 37            |
| 75% dose               | 38             | 19              | 8               | 8             | 3            | 12            |
| 50% dose               | 6              | 2               | 2               | 3             | 3            | 2             |
|                        | <i>p 0.002</i> | <i>p 0.003</i>  | <i>p 0.2</i>    | <i>p 0.02</i> | <i>p 0.8</i> | <i>p 0.15</i> |

**Table 5S. Comparison of patients' characteristics according to sequence in each subgroup.**

|                         | <b>wt (81)</b> | <b>Codon 12 (49)</b> | <b>Codon 13 (17)</b> | <b>Rare (16)</b> | <b>G12C (7)</b> | <b>G12D (20)</b> |
|-------------------------|----------------|----------------------|----------------------|------------------|-----------------|------------------|
| <b>Median age (yrs)</b> |                |                      |                      |                  |                 |                  |
| TFD/TPI-Rego            | 68.2           | 68.7                 | 64.0                 | 63.9             | 64.2            | 68.6             |
| Rego-TFD/TPI            | 65.2           | 62.0                 | 70.7                 | 71.8             | 62.0            | 55.0             |
| <i>p</i>                | <i>p 0.80</i>  | <i>p 0.66</i>        | <i>p 0.66</i>        | <i>p 0.54</i>    | <i>p 0.92</i>   | <i>p 0.27</i>    |
| <b>Gender (M/F)</b>     |                |                      |                      |                  |                 |                  |
| TFD/TPI-Rego            | 24/16          | 18/11                | 4/5                  | 5/6              | 4/1             | 7/3              |
| Rego-TFD/TPI            | 25/16          | 13/7                 | 3/4                  | 2/4              | 1/1             | 8/2              |
| <i>p</i>                | <i>p 0.89</i>  | <i>p 0.90</i>        | <i>p 0.65</i>        | <i>p 0.97</i>    | <i>p 0.89</i>   | <i>p 1.0</i>     |
| <b>PS ECOG:</b>         |                |                      |                      |                  |                 |                  |
| TFD/TPI-Rego            |                |                      |                      |                  |                 |                  |
| <b>0</b>                | 10             | 9                    | 1                    | 3                | 1               | 3                |
| <b>1</b>                | 27             | 18                   | 7                    | 5                | 3               | 7                |
| <b>2</b>                | 3              | 2                    | 1                    | 2                | 1               | 0                |
| Rego-TFD/TPI            |                |                      |                      |                  |                 |                  |
| <b>0</b>                | 16             | 7                    | 0                    | 1                | 1               | 3                |
| <b>1</b>                | 22             | 11                   | 7                    | 4                | 1               | 6                |

|          |               |               |               |               |               |               |
|----------|---------------|---------------|---------------|---------------|---------------|---------------|
| 2        | 3             | 2             | 1             | 1             | 0             | 1             |
| <i>p</i> | <i>p 0.39</i> | <i>p 0.90</i> | <i>p 0.62</i> | <i>p 0.78</i> | <i>p 0.64</i> | <i>p 0.58</i> |

**Primary tumor location**

TFD/TPI-Rego

|        |    |    |   |   |   |   |
|--------|----|----|---|---|---|---|
| Right  | 11 | 11 | 4 | 6 | 2 | 1 |
| Left   | 19 | 10 | 4 | 4 | 3 | 7 |
| Rectum | 11 | 8  | 1 | 1 | 0 | 2 |

Rego-TFD/TPI

|          |               |               |               |               |               |               |
|----------|---------------|---------------|---------------|---------------|---------------|---------------|
| Right    | 10            | 7             | 2             | 2             | 1             | 5             |
| Left     | 26            | 7             | 4             | 3             | 1             | 4             |
| Rectum   | 15            | 6             | 2             | 1             | 0             | 1             |
| <i>p</i> | <i>p 0.73</i> | <i>p 0.97</i> | <i>p 0.62</i> | <i>p 0.69</i> | <i>p 0.54</i> | <i>p 0.14</i> |

**Metastatic synchronous disease:**

|              |                      |               |              |               |               |              |
|--------------|----------------------|---------------|--------------|---------------|---------------|--------------|
| TFD/TPI-rego | 33                   | 22            | 4            | 8             | 4             | 7            |
| Rego-TFD/TPI | 25                   | 12            | 5            | 5             | 1             | 8            |
| <i>p</i>     | <b><i>p 0.05</i></b> | <i>p 0.38</i> | <i>p 1.0</i> | <i>p 0.91</i> | <i>p 0.89</i> | <i>p 1.0</i> |

**Site of metastatic disease**

TFD/TPI-Rego

|                      |    |    |   |   |   |   |
|----------------------|----|----|---|---|---|---|
| <b>Liver only</b>    | 6  | 2  | 3 | 1 | 2 | 2 |
| <b>Liver + other</b> | 18 | 14 | 4 | 9 | 2 | 5 |
| <b>Other sites</b>   | 16 | 13 | 2 | 1 | 1 | 3 |

Rego-TFD/TPI

|                      |    |    |   |   |   |   |
|----------------------|----|----|---|---|---|---|
| <b>Liver only</b>    | 6  | 4  | 1 | 3 | 0 | 1 |
| <b>Liver + other</b> | 20 | 6  | 4 | 2 | 2 | 5 |
| <b>Other sites</b>   | 15 | 10 | 3 | 1 | 0 | 4 |

*p*                      *p 0.93*                      *p 0.25*                      *p 0.56*                      *p 0.11*                      *p 0.34*                      *p 0.78*

**Previous lines of therapy**

TFD/TPI-Rego

|              |    |    |   |   |   |   |
|--------------|----|----|---|---|---|---|
| <b>2</b>     | 19 | 23 | 3 | 6 | 4 | 3 |
| <b>3</b>     | 18 | 4  | 2 | 3 | 1 | 7 |
| <b>4</b>     | 2  | 1  | 3 | 1 | 0 | 0 |
| <b>&gt;4</b> | 1  | 1  | 1 | 1 | 0 | 0 |

TFD/TPI

|          |    |    |   |   |   |   |
|----------|----|----|---|---|---|---|
| <b>2</b> | 16 | 11 | 7 | 3 | 2 | 6 |
| <b>3</b> | 19 | 3  | 1 | 2 | 0 | 4 |
| <b>4</b> | 4  | 3  | 1 | 1 | 0 | 0 |

|              |               |               |               |               |               |               |
|--------------|---------------|---------------|---------------|---------------|---------------|---------------|
| <b>&gt;4</b> | 2             | 3             | 0             | 0             | 0             | 0             |
| <i>P</i>     | <i>p 0.40</i> | <i>p 0.18</i> | <i>p 0.26</i> | <i>p 0.84</i> | <i>p 0.60</i> | <i>p 0.36</i> |

**Previous drugs administered:**

TFD/TPI-Rego

|                         |    |    |   |   |   |   |
|-------------------------|----|----|---|---|---|---|
| <b>Fluoropyrimidine</b> | 39 | 29 | 9 | 9 | 4 | 9 |
| <b>Oxaliplatin</b>      | 36 | 28 | 6 | 8 | 5 | 8 |
| <b>Irinotecan</b>       | 33 | 28 | 8 | 7 | 4 | 7 |
| <b>Bevacizumab</b>      | 16 | 23 | 8 | 7 | 3 | 8 |
| <b>Anti-EGFRs</b>       | 34 | 0  | 0 | 0 | 0 | 0 |
| <b>Immunotherapy</b>    | 2  | 1  | 0 | 1 | 0 | 0 |
| <b>Aflibercept</b>      | 10 | 5  | 0 | 2 | 2 | 3 |
| <b>Unknown</b>          | 0  | 0  | 0 | 0 | 0 | 0 |

Rego-TFD/TPI

|                         |    |    |   |   |   |   |
|-------------------------|----|----|---|---|---|---|
| <b>Fluoropyrimidine</b> | 37 | 19 | 6 | 5 | 2 | 9 |
| <b>Oxaliplatin</b>      | 35 | 17 | 5 | 4 | 2 | 8 |
| <b>Irinotecan</b>       | 32 | 17 | 6 | 5 | 2 | 8 |
| <b>Bevacizumab</b>      | 22 | 15 | 6 | 5 | 2 | 7 |
| <b>Anti-EGFRs</b>       | 36 | 0  | 0 | 0 | 0 | 0 |
| <b>Immunotherapy</b>    | 0  | 0  | 1 | 1 | 0 | 0 |
| <b>Aflibercept</b>      | 2  | 4  | 1 | 0 | 0 | 2 |

**Unknown**

2

1

2

0

0

1

*p*

*p 0.16*

*p 0.88*

*p 0.88*

*p 0.96*

*p 0.88*

*p 0.93*



**Fig 1. Time to progression of Rego-treated patients according to RAS extended analysis**

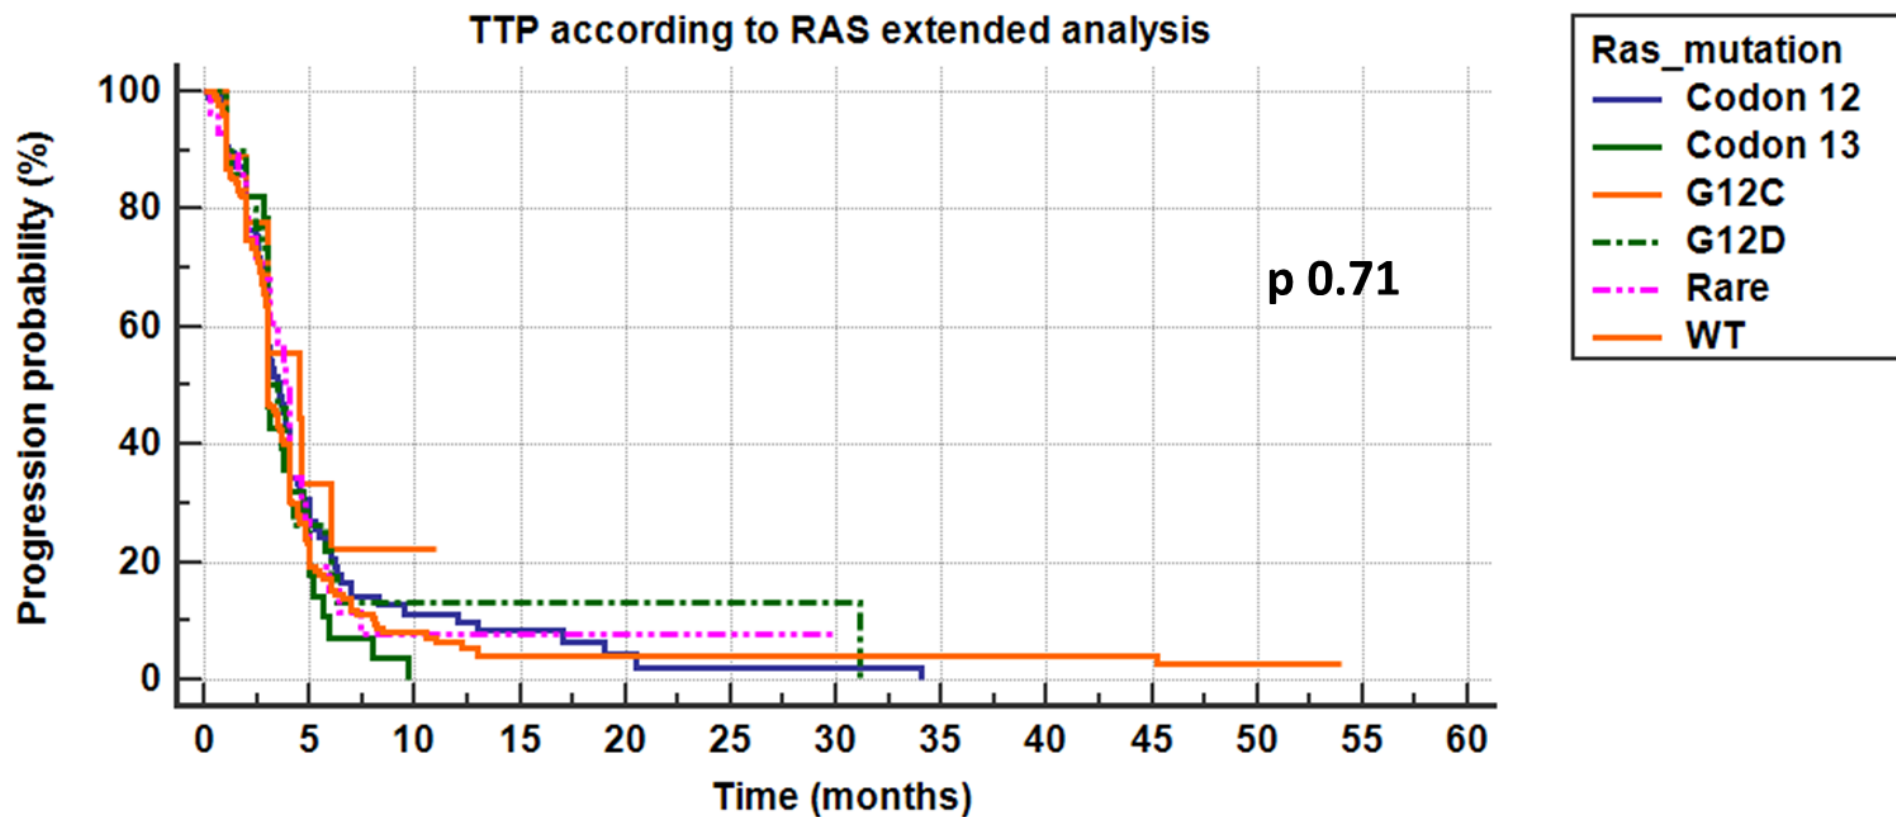

**Mean and median survival**

| Factor   | Mean  | SE    | 95% CI for the mean | Median | 95% CI for the median |
|----------|-------|-------|---------------------|--------|-----------------------|
| Codon 12 | 5.385 | 0.705 | 4.003 to 6.767      | 3.600  | 3.000 to 4.000        |
| Codon 13 | 3.736 | 0.371 | 3.009 to 4.462      | 3.000  | 3.000 to 4.000        |
| G12C     | 5.322 | 1.260 | 2.852 to 7.793      | 4.500  | 3.000 to 6.000        |
| G12D     | 6.993 | 1.943 | 3.185 to 10.801     | 3.000  | 3.000 to 4.000        |
| Rare     | 4.009 | 0.447 | 3.133 to 4.885      | 3.900  | 3.100 to 4.600        |
| WT       | 3.928 | 0.214 | 3.509 to 4.347      | 3.000  | 3.000 to 3.700        |
| Overall  | 5.714 | 0.558 | 4.620 to 6.808      | 3.100  | 3.000 to 3.700        |

**Fig 2. Rego-related OS of patients even receiving TFD/TPI (before or after).**

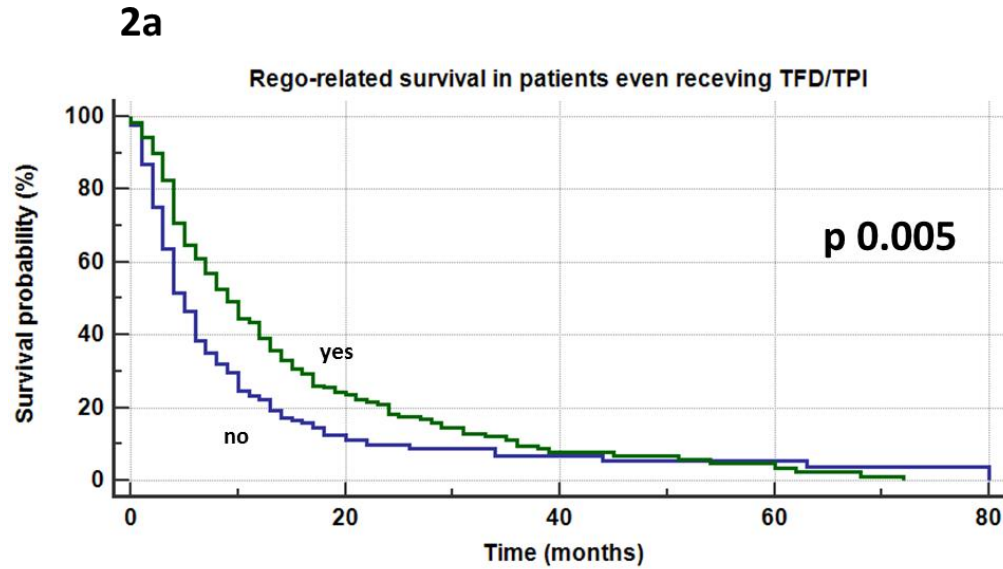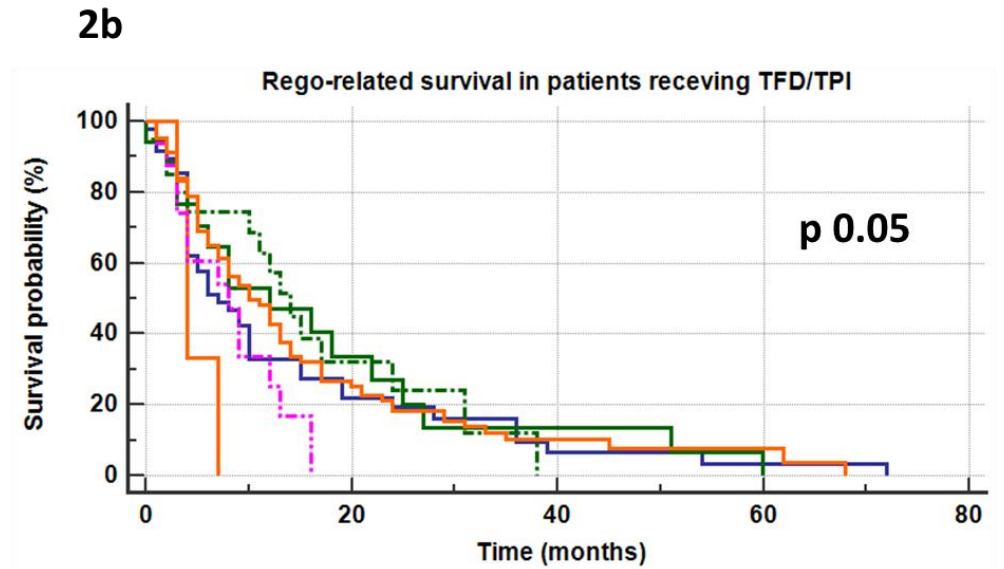

Mean and median survival

| Factor  | Mean   | SE    | 95% CI for the mean | Median | 95% CI for the median |
|---------|--------|-------|---------------------|--------|-----------------------|
| NO      | 10.989 | 1.423 | 8.200 to 13.778     | 5.000  | 4.000 to 6.000        |
| yes     | 14.999 | 1.266 | 12.517 to 17.480    | 9.000  | 7.000 to 12.000       |
| Overall | 12.916 | 0.931 | 11.090 to 14.741    | 6.000  | 6.000 to 8.000        |

Ras\_mutation

- Codon 12
- Codon 13
- G12C
- - - G12D
- ... Rare
- WT

Mean and median survival

| Factor   | Mean   | SE    | 95% CI for the mean | Median | 95% CI for the median |
|----------|--------|-------|---------------------|--------|-----------------------|
| Codon 12 | 8.657  | 0.814 | 7.061 to 10.252     | 7.000  | 4.000 to 10.000       |
| Codon 13 | 15.134 | 3.000 | 9.254 to 21.015     | 12.000 | 5.000 to 22.000       |
| G12C     | 4.833  | 0.642 | 3.575 to 6.091      | 4.000  | 4.000 to 7.000        |
| G12D     | 16.410 | 2.910 | 10.706 to 22.114    | 14.000 | 10.000 to 24.000      |
| Rare     | 8.147  | 1.298 | 5.602 to 10.691     | 8.000  | 4.000 to 12.000       |
| WT       | 5.830  | 0.207 | 5.424 to 6.237      | 10.000 | 8.000 to 13.000       |
| Overall  | 14.999 | 1.266 | 12.517 to 17.480    | 9.000  | 7.000 to 12.000       |

Fig n 3. Time to progression of TFD/TPI-treated patients according to RAS extended analysis

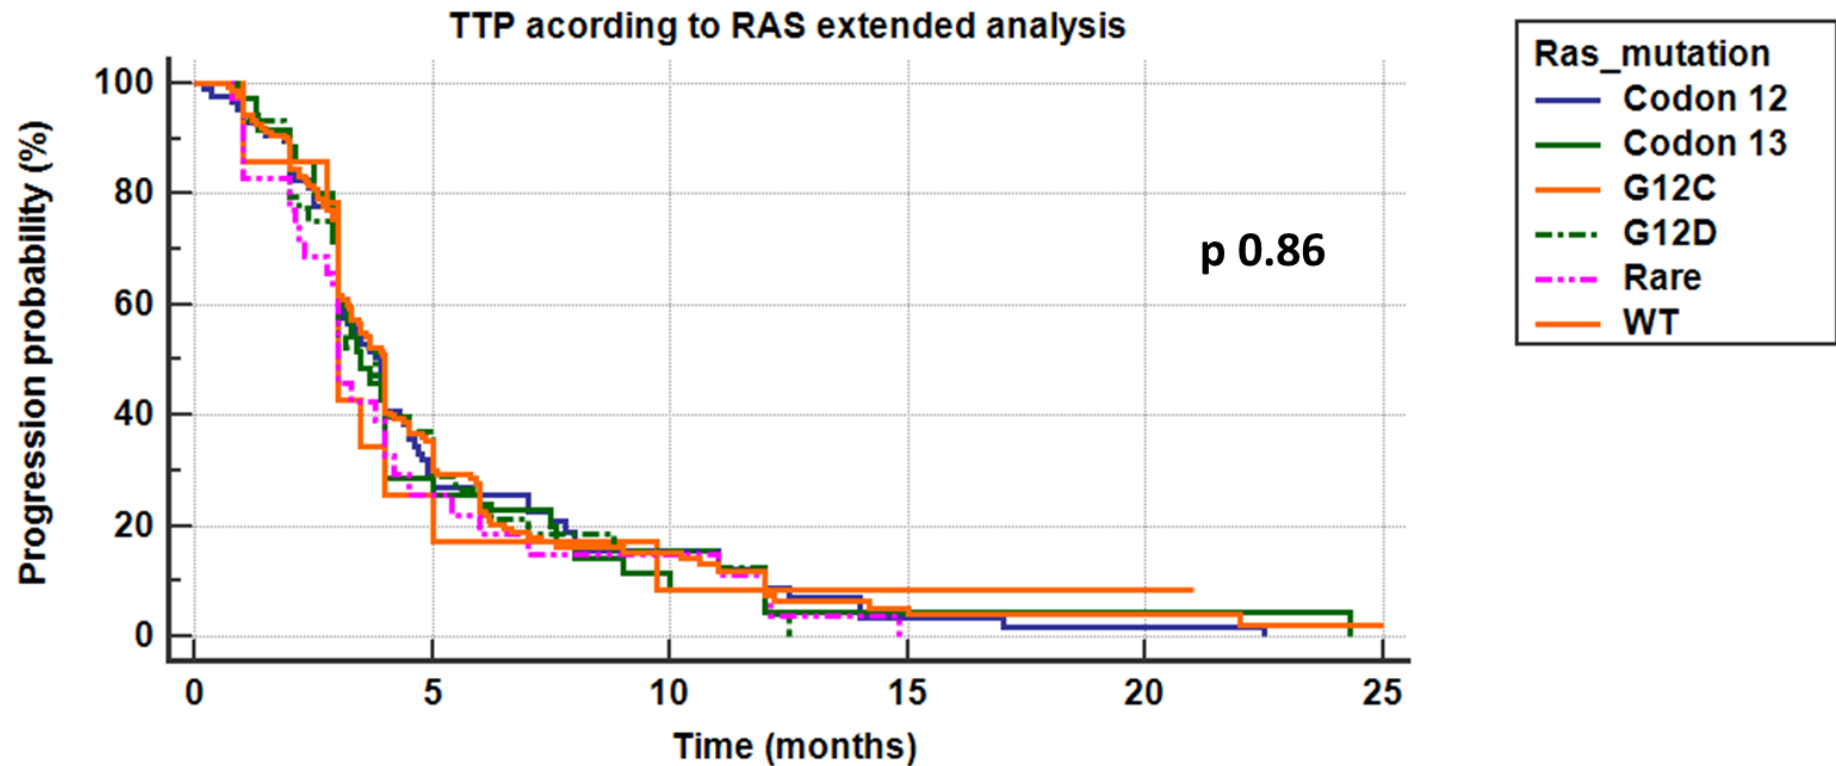

Mean and median survival

| Factor   | Mean  | SE    | 95% CI for the mean | Median | 95% CI for the median |
|----------|-------|-------|---------------------|--------|-----------------------|
| Codon 12 | 5.090 | 0.429 | 4.248 to 5.931      | 3.900  | 3.000 to 4.400        |
| Codon 13 | 4.693 | 0.527 | 3.661 to 5.726      | 3.500  | 3.000 to 4.000        |
| G12C     | 5.203 | 1.583 | 2.100 to 8.306      | 3.000  | 3.000 to 4.000        |
| G12D     | 4.901 | 0.537 | 3.848 to 5.953      | 3.800  | 3.000 to 5.000        |
| Rare     | 4.450 | 0.656 | 3.165 to 5.735      | 3.000  | 2.800 to 4.000        |
| WT       | 5.314 | 0.382 | 4.565 to 6.062      | 4.000  | 3.300 to -            |
| Overall  | 5.199 | 0.252 | 4.705 to 5.692      | 3.700  | 3.300 to 4.000        |

**Fig 4. TFD/TPI-related OS of patients even receiving Rego (before or after).**

**4a**

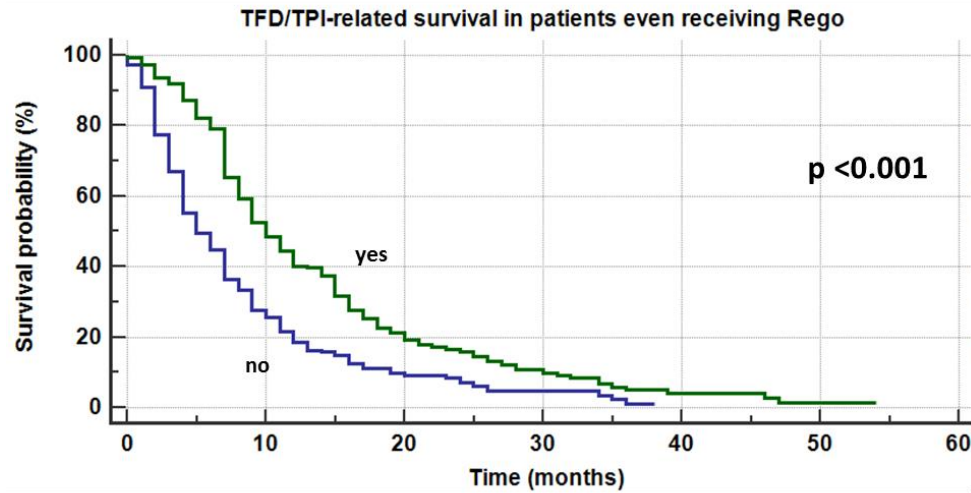

Mean and median survival

| Factor  | Mean   | SE    | 95% CI for the mean | Median | 95% CI for the median |
|---------|--------|-------|---------------------|--------|-----------------------|
| NO      | 8.308  | 0.598 | 7.137 to 9.479      | 5.000  | 4.000 to 7.000        |
| yes     | 13.518 | 0.751 | 12.046 to 14.990    | 10.000 | 9.000 to 12.000       |
| Overall | 11.018 | 0.551 | 9.937 to 12.098     | 7.000  | 7.000 to 9.000        |

**Ras\_mutation**  
 — Codon 12  
 — Codon 13  
 — G12C  
 - - - G12D  
 - · - · Rare  
 — WT

**4b**

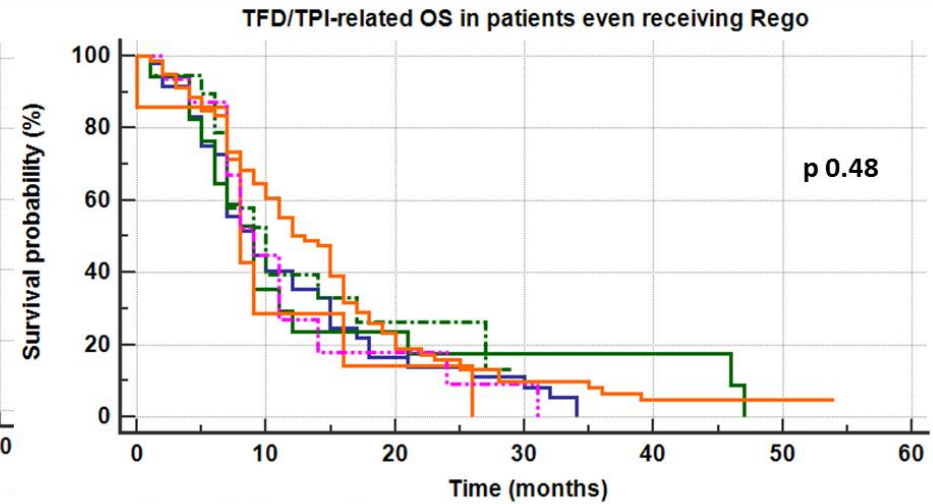

Mean and median survival

| Factor   | Mean   | SE    | 95% CI for the mean | Median | 95% CI for the median |
|----------|--------|-------|---------------------|--------|-----------------------|
| Codon 12 | 11.906 | 1.302 | 9.354 to 14.458     | 9.000  | 7.000 to 12.000       |
| Codon 13 | 11.706 | 2.190 | 7.414 to 15.997     | 9.000  | 6.000 to 12.000       |
| G12C     | 10.571 | 2.885 | 4.918 to 16.225     | 8.000  | 7.000 to 16.000       |
| G12D     | 13.750 | 2.291 | 9.260 to 18.240     | 10.000 | 7.000 to 17.000       |
| Rare     | 11.784 | 2.239 | 7.396 to 16.173     | 9.000  | 7.000 to 14.000       |
| WT       | 13.590 | 0.847 | 11.929 to 15.251    | 13.000 | 10.000 to 16.000      |
| Overall  | 13.981 | 0.868 | 12.280 to 15.683    | 10.000 | 9.000 to 12.000       |

Fig 5. OS of all-RAS wt patients according to sequence (81 pts).

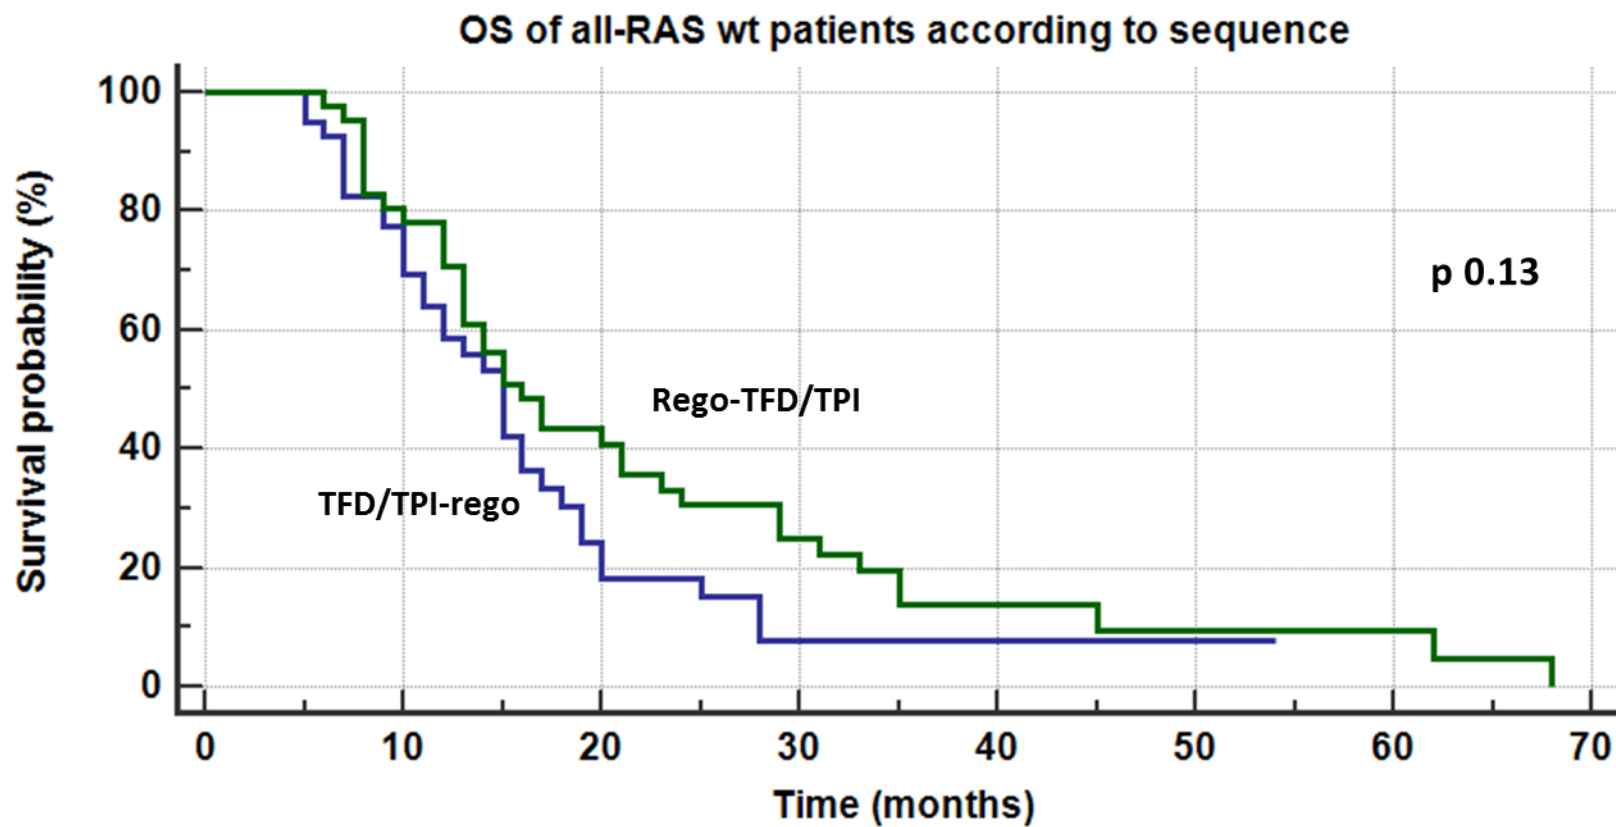

**Fig 6. Rego-related and TFD/TPI-related OS of Codon 13 patients**

**6a**

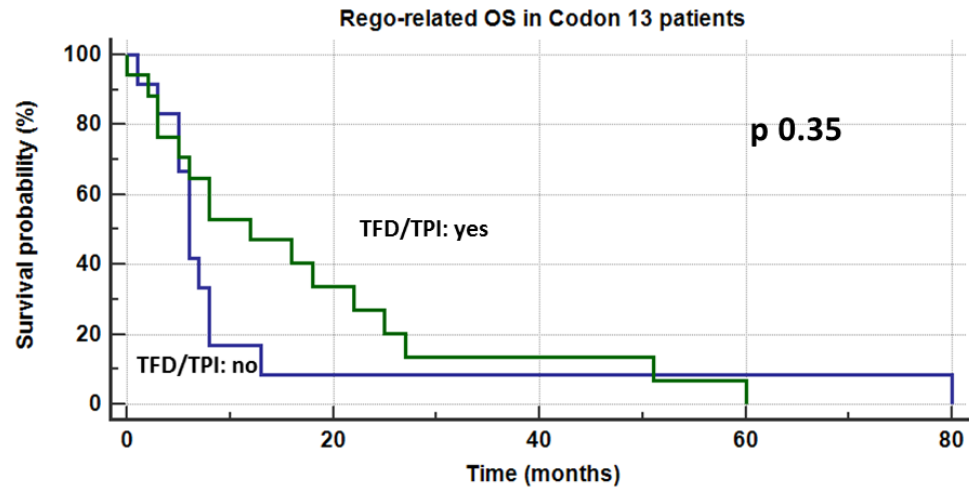

Mean and median survival

| Factor  | Mean   | SE    | 95% CI for the mean | Median | 95% CI for the median |
|---------|--------|-------|---------------------|--------|-----------------------|
| NO      | 12.333 | 6.209 | 0.164 to 24.503     | 6.000  | 5.000 to 8.000        |
| yes     | 17.487 | 4.421 | 8.823 to 26.152     | 12.000 | 5.000 to 22.000       |
| Overall | 15.565 | 3.730 | 8.255 to 22.875     | 8.000  | 6.000 to 13.000       |

**6b**

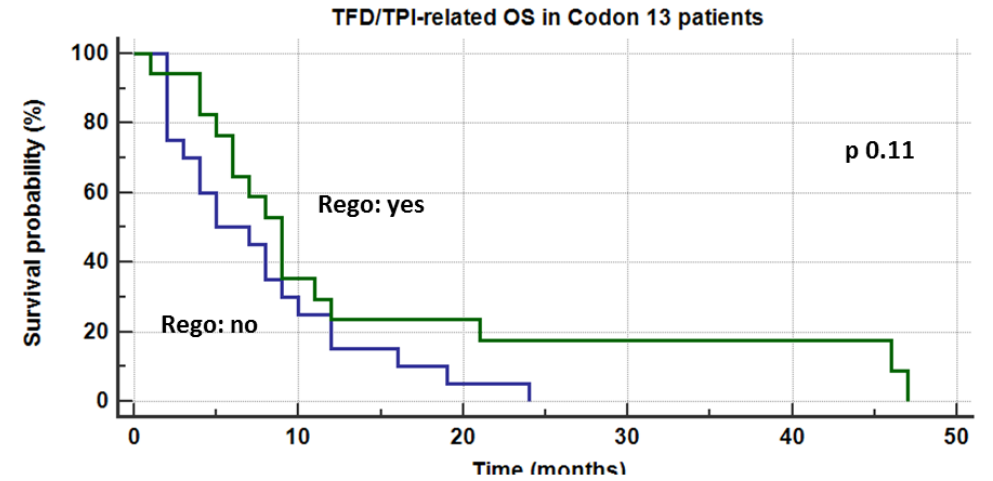

Mean and median survival

| Factor  | Mean   | SE    | 95% CI for the mean | Median | 95% CI for the median |
|---------|--------|-------|---------------------|--------|-----------------------|
| NO      | 7.800  | 1.389 | 5.077 to 10.523     | 5.000  | 3.000 to 10.000       |
| yes     | 14.794 | 3.823 | 7.302 to 22.287     | 9.000  | 6.000 to 12.000       |
| Overall | 11.014 | 1.966 | 7.161 to 14.866     | 8.000  | 5.000 to 9.000        |



Fig 7. OS of Codon 13 patients according to sequence (17 pts).

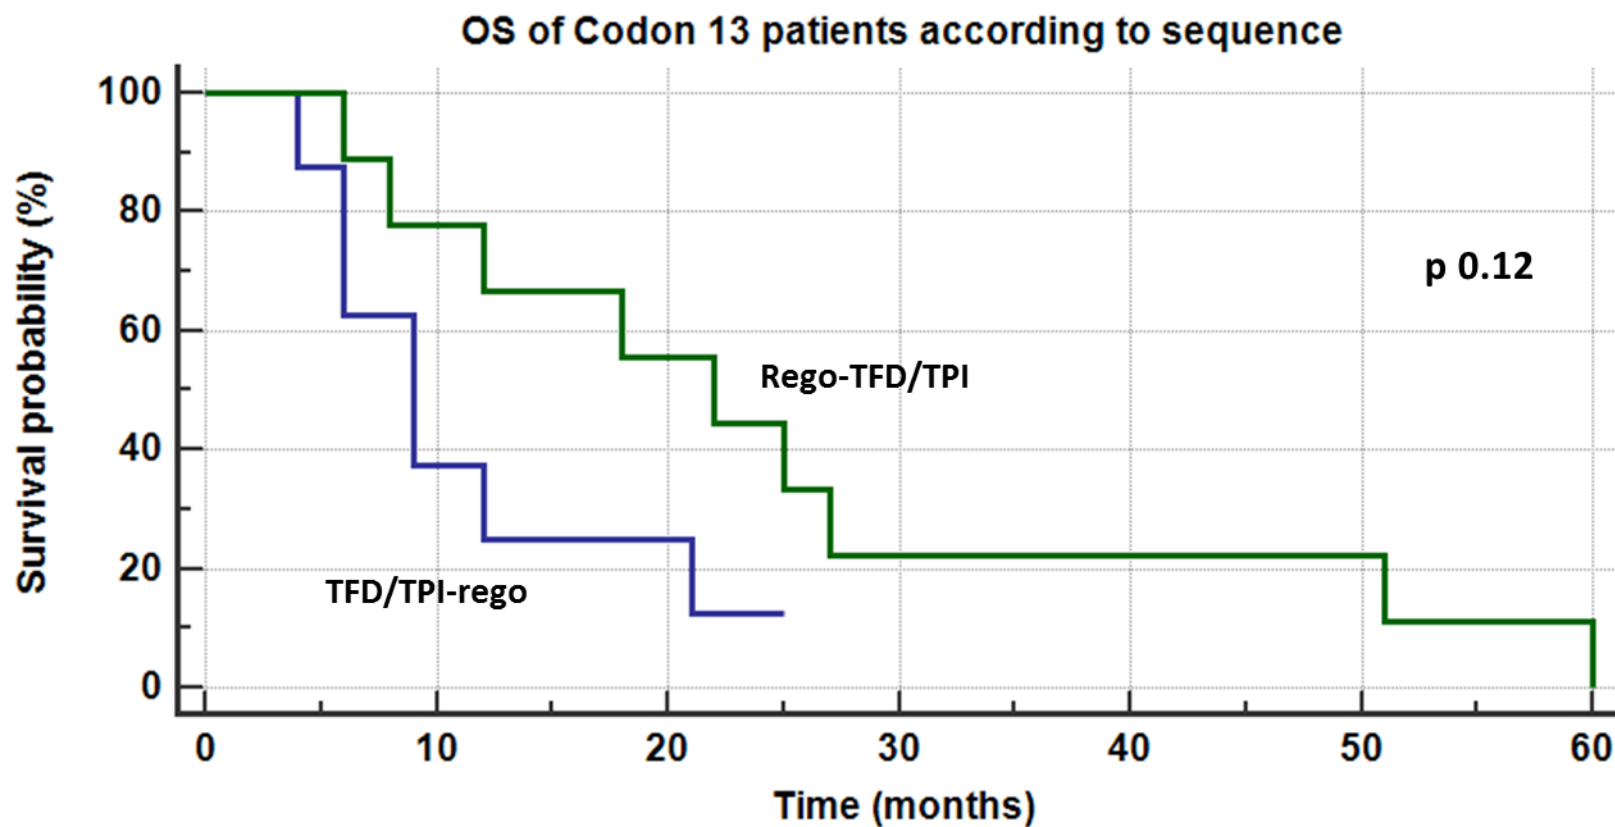

**Fig 8. Rego-related and TFD/TPI-related OS of Rare patients**

**8a**

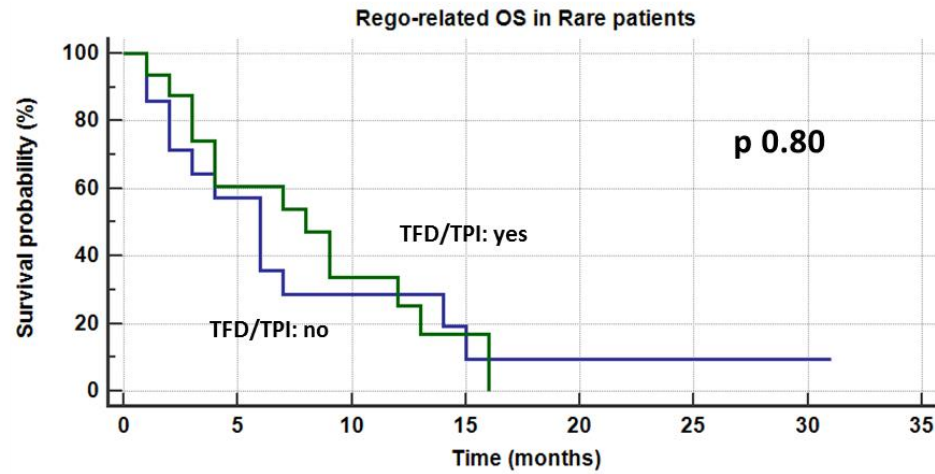

Mean and median survival

| Factor  | Mean  | SE    | 95% CI for the mean | Median | 95% CI for the median |
|---------|-------|-------|---------------------|--------|-----------------------|
| NO      | 7.000 | 1.446 | 4.167 to 9.833      | 6.000  | 2.000 to 14.000       |
| yes     | 8.147 | 1.298 | 5.602 to 10.691     | 8.000  | 4.000 to 12.000       |
| Overall | 8.565 | 1.503 | 5.619 to 11.511     | 6.000  | 4.000 to 9.000        |

**8b**

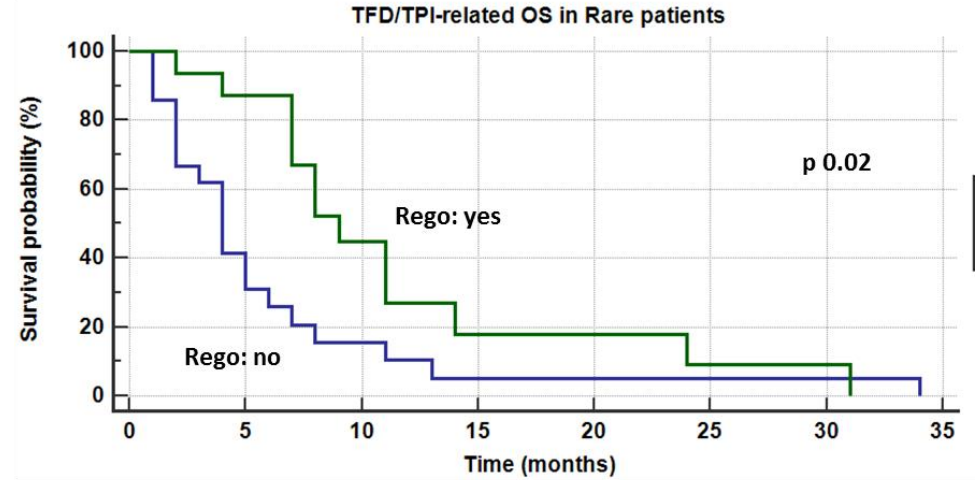

Mean and median survival

| Factor  | Mean   | SE    | 95% CI for the mean | Median | 95% CI for the median |
|---------|--------|-------|---------------------|--------|-----------------------|
| NO      | 5.929  | 1.497 | 2.994 to 8.863      | 4.000  | 2.000 to 6.000        |
| yes     | 11.784 | 2.239 | 7.396 to 16.173     | 9.000  | 7.000 to 14.000       |
| Overall | 8.584  | 1.464 | 5.715 to 11.453     | 7.000  | 4.000 to 8.000        |



Fig 9. OS of Rare patients according to sequence (16 pts).

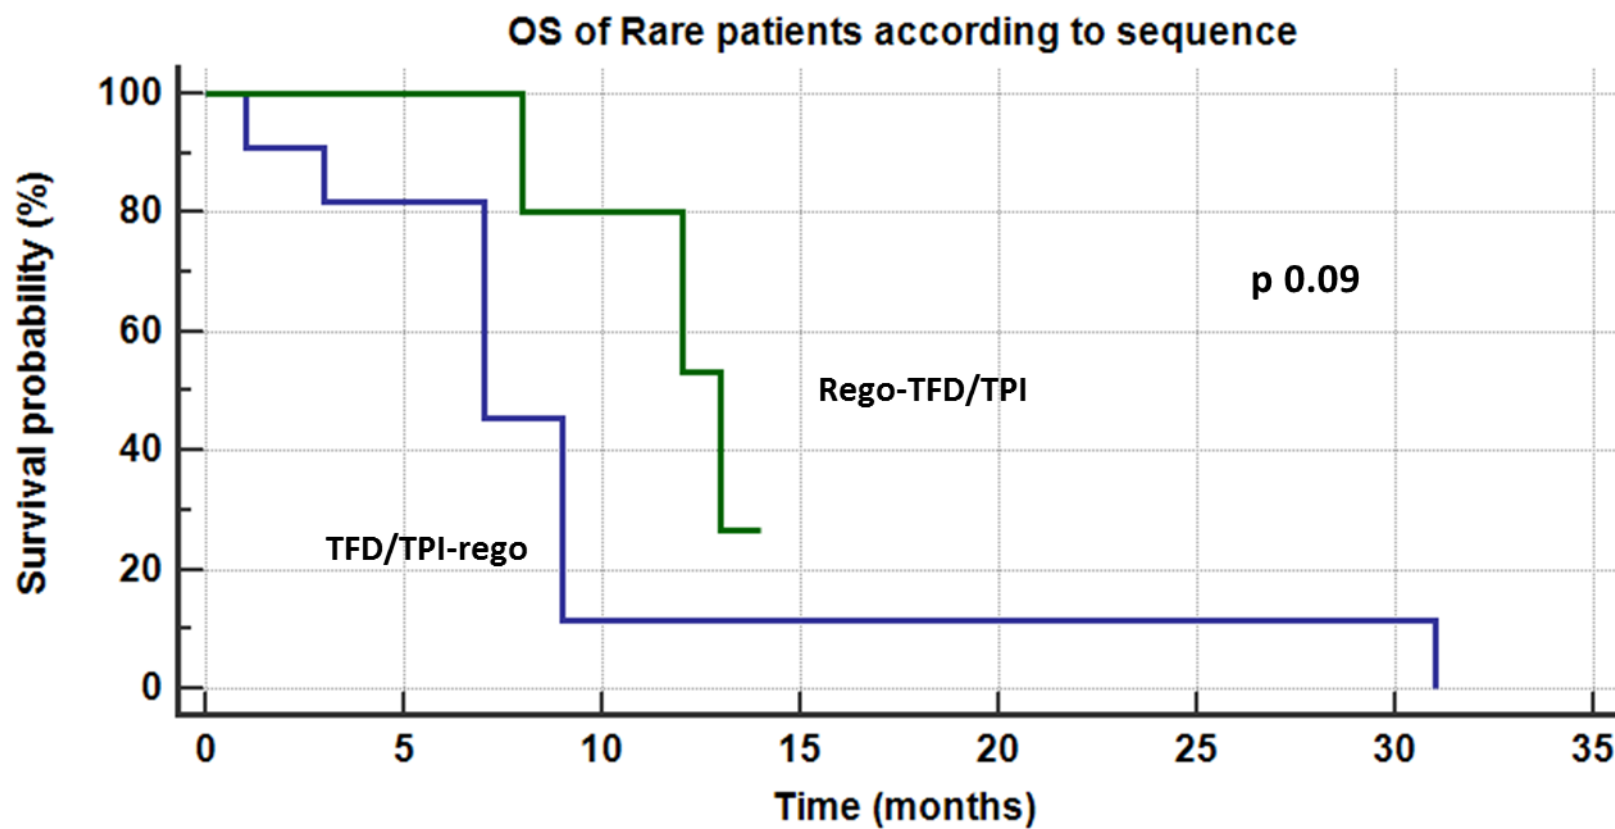

**Fig 10. Rego-related and TFD/TPI-related OS of G12C patients**

**10a**

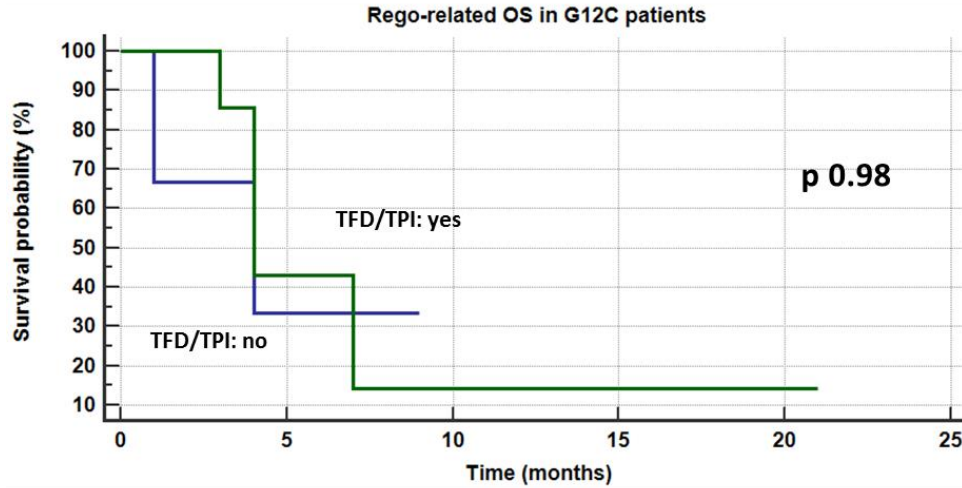

**Mean and median survival**

| Factor  | Mean  | SE    | 95% CI for the mean | Median | 95% CI for the median |
|---------|-------|-------|---------------------|--------|-----------------------|
| NO      | 8.667 | 5.084 | -1.299 to 18.632    | 4.000  | 1.000 to 4.000        |
| yes     | 5.429 | 0.779 | 3.902 to 6.955      | 4.000  | 4.000 to 7.000        |
| Overall | 7.600 | 2.183 | 3.322 to 11.878     | 4.000  | 4.000 to 7.000        |

**10b**

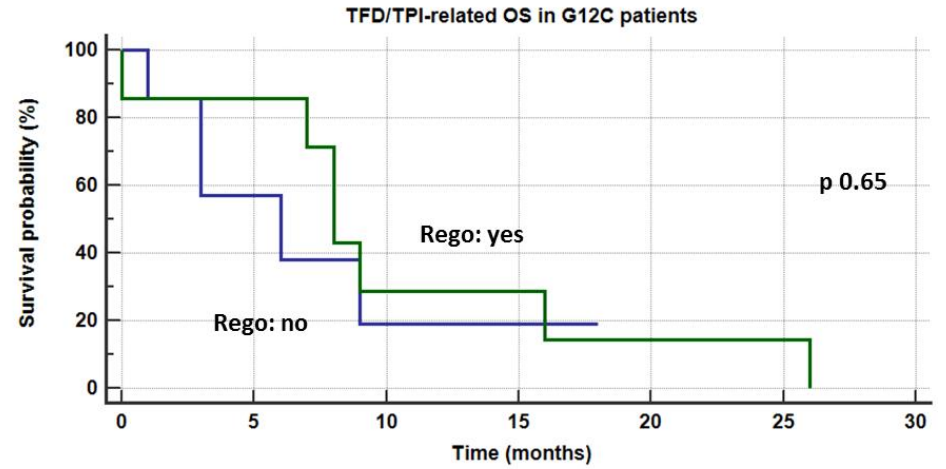

**Mean and median survival**

| Factor  | Mean  | SE    | 95% CI for the mean | Median | 95% CI for the median |
|---------|-------|-------|---------------------|--------|-----------------------|
| NO      | 8.810 | 3.604 | 1.745 to 15.874     | 6.000  | 3.000 to 9.000        |
| yes     | 9.429 | 2.098 | 5.316 to 13.541     | 8.000  | 7.000 to 16.000       |
| Overall | 9.627 | 2.345 | 5.030 to 14.224     | 8.000  | 3.000 to 9.000        |

Fig 11. OS of G12C patients according to sequence (7 pts).

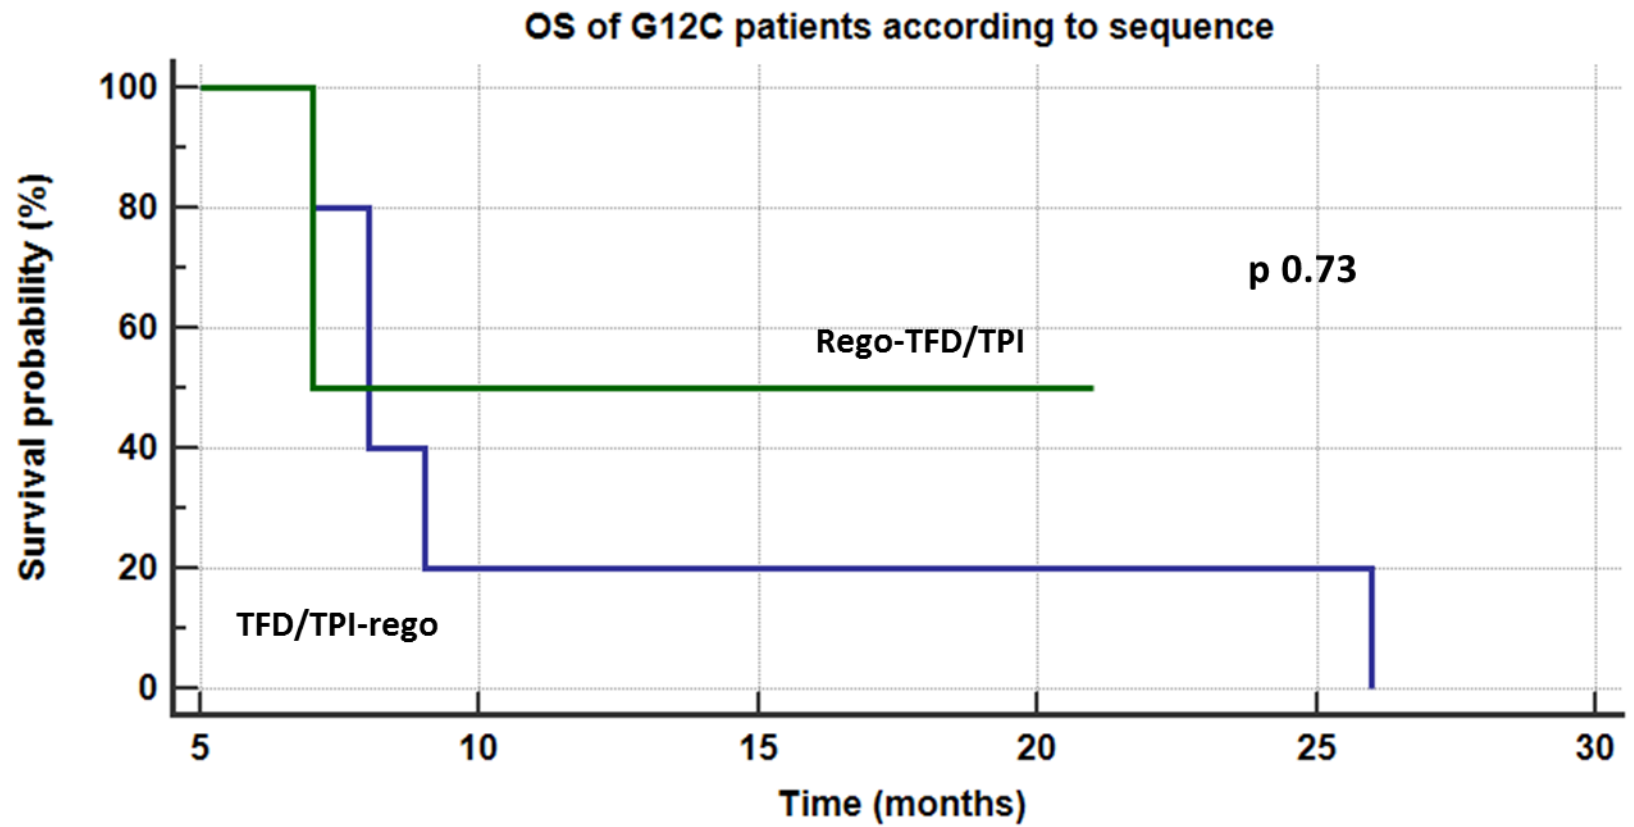

**Fig 12. Rego-related and TFD/TPI-related OS of G12D patients**

**12**  
**a**

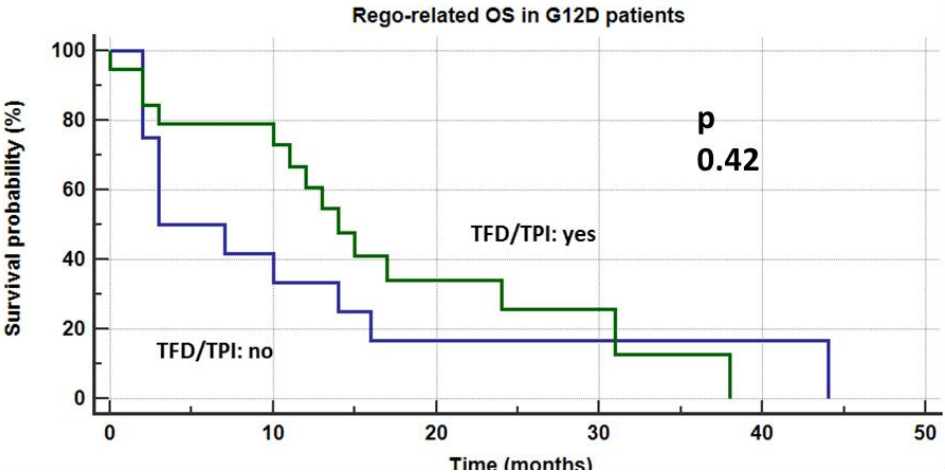

**Mean and median survival**

| Factor  | Mean   | SE    | 95% CI for the mean | Median | 95% CI for the median |
|---------|--------|-------|---------------------|--------|-----------------------|
| NO      | 11.500 | 3.671 | 4.304 to 18.696     | 3.000  | 3.000 to 14.000       |
| yes     | 17.193 | 2.975 | 11.362 to 23.024    | 14.000 | 11.000 to 24.000      |
| Overall | 15.460 | 2.648 | 10.270 to 20.649    | 12.000 | 7.000 to 16.000       |

**12**  
**b**

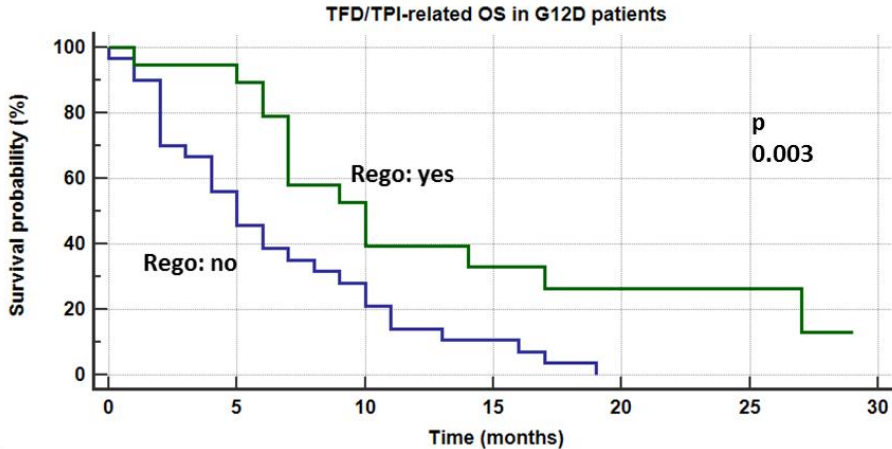

**Mean and median survival**

| Factor  | Mean   | SE    | 95% CI for the mean | Median | 95% CI for the median |
|---------|--------|-------|---------------------|--------|-----------------------|
| NO      | 6.532  | 0.933 | 4.704 to 8.360      | 5.000  | 3.000 to 8.000        |
| yes     | 11.250 | 1.359 | 8.586 to 13.914     | 10.000 | 7.000 to 17.000       |
| Overall | 9.133  | 1.114 | 6.951 to 11.316     | 7.000  | 5.000 to 10.000       |

Fig 13. OS of G12D patients according to sequence (20 pts).

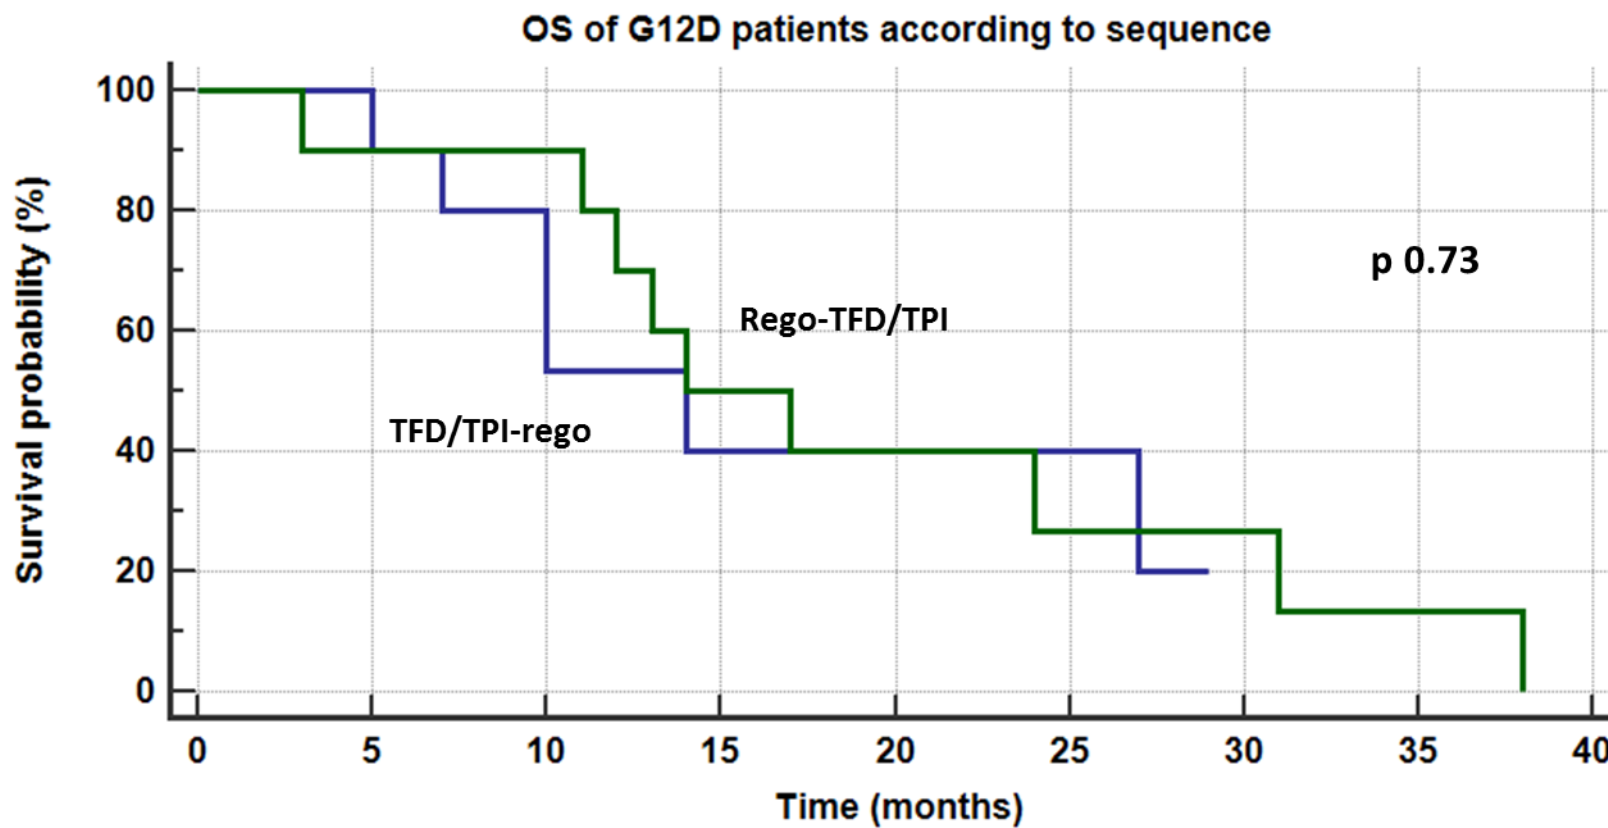

Supplement: MOESM1 [file 26976036]
